# Supplementary material
Source: PubMed Central journal article supplement (PMC4333347)
Supplement: NIHMS656488-supplement-01.pdf [file NIHMS656488-supplement-01.pdf]

**In Brief: Based on the analysis of taste receptor genes, Zhao et al. show that penguins have lost sweet, umami and bitter taste.**

**Supplemental Information**

**Supplemental Information including supplemental results, discussion and experimental procedures and one figure and one table can be found with this article online at \*bxs.**

**Supplemental Information**

**Document S1. Experimental Procedures and One figure and one table**

## **Supplemental Information: *Molecular evidence for the loss of three basic tastes in penguins***

Huabin Zhao, Jianwen Li, and Jianzhi Zhang

### **SUPPLEMENTAL BACKGROUND**

Of the five basic tastes of vertebrates, sweet and umami tastes promote the consumption of nutrition by recognizing sugars and amino acids in food resources, respectively, while bitter and sour tastes tend to be associated with toxins and spoiled food and thus help avoid ingesting harmful compounds. The salty taste results in either consumption or rejection of a potential food item depending on an individual's physical need of salt [S1].

Prior to the identification of the taste receptor genes, our knowledge of animal taste sensations were based exclusively on behavioral studies, which are feasible in only a small number of species. As a result, our understanding of the animal taste variation and its ecological and evolutionary basis was limited. The elucidation of the molecular foundation of taste in the last 15 years allows inferring taste senses of a vertebrate by examining its taste receptor genes. Recent applications of this approach suggest previously unsuspected variations in mammalian taste senses [S2-7]. Compared with mammals, birds are thought to be poor tasters, because of their low numbers of taste buds, lack of mastication, and low saliva secretion [S8-10]. As a result, in spite of a huge dietary diversity among birds [S11], the avian taste system and taste receptor genes have not been well characterized [S8]. Preliminary surveys revealed a general reduction in the number of avian taste receptor genes. For example, the sweet taste receptor gene *Tas1r2* is absent from all bird genomes examined so far [S5, 12, 13] and the *Tas2r* bitter receptor gene repertoire is diminutive in birds compared with mammals [S14]. However, recent work also showed that all chicken and turkey *Tas2rs* are broadly tuned receptors that allow the recognition of a wide range of bitter compounds, suggesting that the low number of *Tas2rs* in birds could be compensated by their broad tuning [S15]. It was reported that the ratio between the taste bud number and food load in one bite is likely greater in chicken than in most mammals, suggesting that the avian taste ability is better than commonly appreciated [S8]. Notably, the *Tas2r* gene repertoire has expanded to at least 18 intact members in white-throated sparrow, potentially associated with the radiation of the sparrow subfamily into the New World [S16]. The ancestral umami receptor *Tas1r1* was recently reported to have been converted to detecting sugar in the evolution of hummingbirds, which may have facilitated their massive radiation in a nectarivorous niche [S12]. Apparently, the avian taste system has a tremendous variation, especially among species facing different ecological niches.

To further explore the variation in the bird taste system, we choose to study penguins, aquatic flightless birds whose geographic distribution includes the coldest niche on Earth, the Antarctic. Penguins form the order Sphenisciformes, with 18 extant species. They originated in the Antarctica some 40 million years ago [S17] and subsequently dispersed throughout the southern hemisphere, with eight species still living in the Antarctic and sub-Antarctic regions [S18].

### **SUPPLEMENTAL RESULTS**

#### **Sweet taste receptor gene *Tas1r2* is missing in all bird genomes**

We started by analyzing high-coverage genome sequences of Adelle penguin (*Pygoscelis adeliae*), emperor penguin (*Aptenodytes forsteri*), and little egret (*Egretta garzetta*) [S19], and 13 publically available genome sequences from non-penguin birds (Fig. 1). Both Adelle and emperor penguins inhabit the Antarctica [S18], while the little egret, belonging to Ciconiiformes, represents a relatively close outgroup of penguins. Using each exon of mouse *Tas1r2* (GenBank accession no. NM\_031873) as a query, we undertook BLAST searches to identify *Tas1r2* that encodes the specific subunit of the sweet taste receptor in each of the 16 bird genomes. We could not detect *Tas1r2* in any bird genome, including the two penguins (Fig. 1), although this gene was identified in the genomes of mammals, reptiles, and other vertebrates using similar approaches [S5, 12, 13]. In most mammalian genome sequences surveyed, *Pax7* and *Aldh4a1* are adjacent to *Tas1r2* [S5], but these two genes are now adjacent to each other in the chicken genome [S13]. Using a similar BLAST analysis, we found that *Pax7* and *Aldh4a1* are syntenic in the two penguins and all other birds, suggesting a true loss of *Tas1r2* in all bird genomes rather than incomplete sequencing.

### **Penguin-specific loss of umami taste receptor gene *Tas1r1***

Using each exon of the chicken *Tas1r1* (GenBank accession no. XM\_425740) as a query, we searched for the umami taste receptor-specific gene *Tas1r1* in the 16 bird genomes. In contrast to *Tas1r2*, we could identify *Tas1r1* in both penguins, but in both species it is a pseudogene characterized by a common 2-bp deletion that results in premature stop codons (Fig. S1a). However, *Tas1r1* is intact in all non-penguin bird genomes examined (Fig. 1), suggesting that the pseudogenization of *Tas1r1* is penguin-specific. To confirm this result, we examined three additional penguin species, one species in Gaviiformes, and seven species in Procellariiformes (tubenose seabirds); the latter order is the closest outgroup of penguins [S20]. From these 11 birds with no genome sequences, we attempted to amplify exon 3 (~770 bp) and exon 6 (~600 bp) of *Tas1r1*; together they account for ~60% of the coding region and most of the functional domains. We could amplify and sequence exon 3 from two of the three penguins and seven of the eight outgroup species, and could amplify and sequence exon 6 from only two of the outgroup species. While all amplified sequences from all outgroup species have intact open reading frames (ORFs), the amplified sequences from penguins contain premature stop codons (Fig. S1f). In fact, all four penguins with exon 3 sequences share the aforementioned 2-bp deletion (Fig. S1a), which is predicted to result in the loss of most of the extracellular domain and all transmembrane domains of the receptor. Because these four penguins represent all basal lineages of extant penguins [S17], our finding indicates that the pseudogenization of *Tas1r1* occurred in the common ancestor of all extant penguins since its divergence from tubenose seabirds.

### **Penguin-specific loss of *Tas1r3***

We next examined *Tas1r3*, which encodes a subunit in both the sweet and umami taste receptors. We found that *Tas1r3* is intact in each non-penguin bird genome examined, but failed to detect this gene in the two penguin genomes. We confirmed that *Glt1d1* and *Dvll1*, which are adjacent to *Tas1r3* in the mouse, chicken, and zebra finch genomes, are adjacent to each other in the two penguin genomes. We attempted to amplify and sequence exon 3 and exon 6 of *Tas1r3*, covering ~70% of its coding region, in the 11 species mentioned above. We could amplify and sequence exon 3 in 5 of the outgroup species and exon 6 in all 8 outgroup species; these segments of the ORF are intact in all of these sequences (Fig. S1f). By contrast, neither exon

was amplifiable in the three penguins (Fig. S1f). These results strongly suggest that *Tas1r3* was lost in the common ancestor of all extant penguins after its divergence from tubenose seabirds (Fig. 1).

### **Penguin-specific losses of *Tas2r* bitter taste receptor genes**

Following a previous study [S13], we used all published bitter taste receptor genes (*Tas2rs*) from mammals and birds as queries to conduct TBLASTN searches in each of the 16 bird genomes. The identified genes were classified into three categories: (i) intact genes, referring to those with a complete and intact ORF; (ii) partial genes, referring to those with a partial coding region resulting from incomplete genome sequencing; and (iii) pseudogenes, which have a disrupted ORF due to premature stop codons or frame-shifting mutations. We detected 1 to 7 intact *Tas2rs* from each of the 14 non-penguin bird genomes (Fig. S1g), suggesting that these birds all possess a sense of bitter taste. The total number of the three categories of *Tas2rs* ranges from 2 to 12 (Fig. S1g). Of note, the little egret has two intact *Tas2rs* and one pseudogene. Strikingly, we did not find any intact or partial *Tas2r* in the two penguin genomes. Instead, we found three *Tas2r* pseudogenes in each penguin (Fig. S1g). A phylogenetic analysis of the nine *Tas2r* sequences from the two penguins and the little egret suggests that they are three one-to-one-to-one orthologs. We aligned the only pseudogene (*Tas2r3*) from the little egret with its orthologs from the two penguins, and observed multiple shared premature stop codons (Fig. S1b), suggesting that this gene was pseudogenized before the divergence between penguins and the little egret.

We next asked when the remaining two *Tas2r* pseudogenes (*Tas2r1* and *Tas2r2*) found in each of the two penguin genomes became pseudogenized. To this end, we attempted to amplify and sequence these two genes from the three additional penguins aforementioned. We found these genes either pseudogenized or unamplifiable in each species (Fig. S1c,d,f). All five penguins examined share a premature stop codon in *Tas2r1* (Fig. S1c, f) that would render most transmembrane domains of the receptor truncated. A common premature stop codon in *Tas2r2* exists in three penguins (Fig. S1d), but this region is missing in the Adelie penguin genome and cannot be amplified from the chinstrap penguin. Given the phylogenetic relationships among the five penguins (Fig. 1), it is most likely that the shared premature stop codon already existed in the common ancestor of all five penguins and that this region was subsequently deleted in the common ancestor of Adelie and chinstrap penguins. Because the premature stop codon would lead to the loss of most functional domains of *Tas2r2*, we infer that the gene was no longer functional in the common ancestor of all five examined penguins. In the eight outgroup species where we attempted to amplify *Tas2r1* and *Tas2r2*, with one exception, all amplified sequences of the two genes have intact ORFs (Fig. 1; Fig. S1f). The exception is the loon, where both *Tas2r1* and *Tas2r2* are also pseudogenized, apparently independently from the pseudogenization events in penguins (Fig. 1; Fig. S1f). Because the examined penguins represent all basal penguin lineages, our data strongly suggest that the bitter taste function was lost in the common ancestor of all extant penguins after its separation from tubenose seabirds, as a result of the pseudogenization of *Tas2r1* and *Tas2r2*.

### **Conservation of sour and salty taste receptor genes in penguins**

Pkd211, a polycystic-kidney-disease-like ion channel, is believed to function as a sour taste receptor [S1], although additional sour receptors likely exist [S21]. The Pkd211 gene was detected in each of the 16 bird genomes examined. With one exception, all bird *Pkd211* genes

possess an intact ORF ranging between 2,361 and 2,415 bp. The exception is the macaw *Pkd21l*, which has a partial coding region (1,743 bp) with a start codon but no stop codon, due to incomplete genome sequencing. We calculated nonsynonymous ( $d_N$ ) and synonymous ( $d_S$ ) nucleotide distances, and found that the  $d_N/d_S$  ratio for *Pkd21l* is significantly lower than 1 in all pairwise comparisons among the 16 sequences (mean = 0.14,  $P < 0.01$ , Z test). These results strongly suggest that *Pkd21l* is evolutionarily conserved in all birds examined (Fig. 1).

The three genes *Scnn1a*, *Scnn1b*, and *Scnn1g* encode three subunits of the epithelial sodium channel ENaC, believed to be a salty taste receptor in mammals [S1]. We were able to identify all three genes in each of the 16 avian genomes, and all of the genes are either intact or nearly complete with no premature stop codon detected. Consistently, the average pairwise  $d_N/d_S$  ratio for each of the three genes is significantly lower than 1 ( $P < 0.01$ , Z test).

These results suggest that penguins perceive sour and salty tastes (Fig. 1), but because the receptor genes studied may have other functions and because not all receptors for the two tastes are known, a behavioral test is needed to verify this prediction.

### **Relaxed selective constraints on umami, sweet, and bitter transduction genes in penguins**

In addition to taste receptors, other components of taste signal transduction may also shed light on the evolution of taste perception. Two proteins, *Trpm5* (transient receptor potential cation channel subfamily M member 5) and *Calhm1* (calcium homeostasis modulator 1), are of particular interest because both are indispensable for umami, sweet, and bitter taste transductions [S22, 23]. Mice deficient for *Trpm5* or *Calhm1* have abolished or severely impaired bitter, umami, and sweet tastes, but have normal sour and salty tastes [S22-24]. Furthermore, these two genes are pseudogenes in at least some whales lacking functional receptor genes for umami, sweet, and bitter tastes [S6]. *Plcβ2* (phospholipase C, beta 2) is another protein indispensable for the transduction of the three tastes [S23]. However, this protein also plays roles in the immune system [S25, 26]. In fact, *Plcβ2* was never found to be a pseudogene in any whale lacking the receptor genes for the three tastes [S6]. We thus focused on *Trpm5* and *Calhm1*.

We identified all 24 complete exons of *Trpm5* in 14 non-penguin birds and two penguins. After aligning the sequences, we found neither frame-shifting mutations nor premature stop codons. To investigate the possibility of relaxation of purifying selection in penguins, we analyzed two data sets, and estimated  $d_N/d_S$  (termed  $\omega$ ) using a likelihood method (see Supplementary Experimental Procedures). In Dataset I, we included the inferred sequence of the common ancestor of Adelie and emperor penguins, as well as the sequences from the 14 non-penguins. We assumed that all branches have the same  $\omega_0$  (model A in Table S1) and estimated that  $\omega_0 = 0.197$ , indicative of overall purifying selection acting on the gene in birds. When the exterior branch leading to the ancestral sequence of penguins was allowed a separate  $\omega$  (model B), we found the  $\omega$  of this branch ( $\omega_2 = 0.496$ ) greater than that of other branches ( $\omega_1 = 0.192$ ) and the likelihood significantly improved compared with that under model A ( $P = 0.0037$ ; Table S1). This result supports the hypothesis that purifying selection on *Trpm5* has been relaxed in the common ancestor of penguins. However, model C, which is identical to model B except that  $\omega_2$  is fixed at 1, has a significantly lower likelihood than model B ( $P = 0.037$ ; Table S1), suggesting that the purifying selection is not completely relaxed in the ancestral penguin branch. In Dataset II, we analyzed all 16 bird *Trpm5* sequences. After comparing models D with E (Table S1), we did not observe a significant difference in  $\omega$  between the ancestral branch of the two penguins and the branches connecting the two penguins ( $P > 0.05$ ), suggesting similar levels of relaxed selection on *Trpm5* before and after the radiation of extant penguins. However, the

relaxation is incomplete, because model D has a significantly higher likelihood than model F, in which the penguin ancestral branch as well as the branches connecting the two penguins all have a fixed  $\omega$  of 1 (Table S1).

We similarly analyzed *Calhm1*. This gene consists of two coding exons, both of which were identified in each of the 16 avian genomes analyzed. In exon 1 of *Calhm1*, we observed a 2-bp ORF-disrupting insertion in emperor penguin and a nonsense substitution in Adelie penguin, (Fig. S1e). By contrast, in each of the 14 non-penguin birds, *Calhm1* has an intact ORF. To date the pseudogenization of penguin *Calhm1*, we sequenced both exons of *Calhm1* in the three additional penguins mentioned and three of the eight tubenose seabirds mentioned (Antarctic petrel, Northern fulmar, and streaked shearwater). King penguin has the same 2-bp insertion as in emperor penguin (Fig. S1e), but no ORF-disrupting mutations were found in chinstrap and rockhopper penguins (Fig. S1e). The three tubenose seabirds all have intact *Calhm1* genes (Fig. S1e). We next estimated  $\omega$  values for the gene using the six birds newly sequenced and the 16 birds with genome sequences. After removing the insertion and premature stop codon, we did not find the penguin ancestor to be significantly different from other birds in  $\omega$  ( $P > 0.80$  by comparing models H and G; Table S1). We then tested relaxed selection after the divergence of penguins by comparing models J and I (Table S1). Indeed, we found a significantly higher  $\omega$  for the branches connecting the five penguins than all other branches in the tree ( $P = 3.4 \times 10^{-6}$ ; Table S1). These results suggest that the relaxation of functional constraints on *Calhm1* became apparent after the divergence among penguins, although the possibility that the relaxation started in the common ancestor of penguins could not be excluded.

## SUPPLEMENTAL DISCUSSION

In this work, we studied taste receptor genes responsible for five basic tastes in penguins and related birds. By examining the genome sequences of emperor and Adelie penguins, we discovered that these penguins lack functional genes for the receptors of the sweet, umami, and bitter tastes, but have intact candidate genes for sour and salty tastes. Note, the possibility of a conversion of the umami receptor *Tas1r1-Tas1r3* for sweet detection, reported to have occurred in hummingbirds [S12], does not exist in penguins, because penguins lack the gene (*Tas1r3*) that is indispensable for both umami and sweet tastes. By investigating the genome sequences of 14 other birds and by sequencing the relevant taste receptor genes in three additional penguins and eight species closely related to penguins, we determined that the loss of umami and bitter tastes occurred in the common ancestor of all extant penguins since the divergence from its sister lineage of tubenose seabirds and that the sweet taste was lost much earlier. Consistently, we found that two key genes involved in the signal transduction of the three tastes have undergone functional relaxation (*Trpm5* and *Calhm1*) or even pseudogenization (*Calhm1*) in penguins. Taken together, these results strongly suggest that the sweet, umami, and bitter tastes are absent in all penguins. Although behavioral tests of penguin tastes are lacking, anatomical observations [S27] are consistent with our molecular evidence of a much reduced taste function in penguins.

Why are the sweet, umami, and bitter tastes, especially the latter two, dispensable in penguins? There are several possibilities. The fact that penguins swallow food whole and the structure and function of their tongue [S27] suggest that they need no taste perception, but it is unknown whether these traits are a cause or consequence of their major taste loss. In particular, given that penguins are carnivorous, it seems unlikely that having umami taste would not be advantageous. Of note, the sweet, umami, and bitter tastes rely on the same ion channel, *Trpm5*,

for signal transduction [S23]. Intriguingly, *Trpm5* activity is temperature-sensitive, with lower activities at lower temperatures [S28]. For example, the sweet sensitivity in mice decreases by 3 to 10 fold when the temperature of the sugar water tested drops from 35 to 15°C [S28]. In humans, the bitter taste (but not the sour taste) was also reported to decrease when the temperature drops [S29]. The mean annual temperature of the interior of the Antarctic is -57 °C. Although the coast is warmer, it is still extremely cold. For instance, monthly means at McMurdo Station range from -26 °C in August to -3 °C in January (<http://www.coolantarctica.com/>). Thus, the working temperature of *Trpm5* in ancestral penguins' taste buds was likely close to 0°C. It is probable that *Trpm5* is effectively nonfunctional at this temperature, rendering the umami and bitter tastes that rely on this channel unusable (while the sweet taste had long been lost). This hypothesis can be tested in the future by measuring the sensitivities of penguin *Trpm5* at relevant temperatures. If our hypothesis is true, one wonders why penguin *Trpm5* was not able to adapt to very low temperatures. There are two possibilities. First, the structure of *Trpm5* is such that there may be no mutations within a reasonable population size and time frame that could bring *Trpm5* functional at such low temperatures. Because the temperature at which a Trp protein is sensitive varies greatly among members of the Trp family [S30], it seems unlikely that no mutation could make *Trpm5* sensitive at low temperatures. Furthermore, this hypothesis cannot explain why *Trpm5* remains intact in penguins while *Calhm1* and all relevant taste receptor genes have been pseudogenized. In any case, this hypothesis may be tested by using *in vitro* selection experiments [S31] to examine the possibility and number of mutations needed to make *Trpm5* sensitive near 0°C. Second, *Trpm5* may have another important physiological function in the body of penguins. Because penguins are warm-blooded, this second function, if it exists, would require *Trpm5* to be sensitive at penguin's body temperature (e.g., 39°C in emperor penguins). Due to antagonistic pleiotropy [S32], it may be impossible for the same *Trpm5* to function at 39°C as well as near 0°C, given its temperature-dependent property. The antagonistic pleiotropy hypothesis would explain why the ORF of penguin *Trpm5* is still maintained and purifying selection has been relaxed only partially. The possibility that *Trpm5* has another function is supported by the finding in mice that *Trpm5* regulates glucose-mediated insulin secretion in beta cells [S33, 34]. It appears that this regulation in mice is only partially dependent on *Tas1r2* [S33, 35], suggesting that *Trpm5*'s role in insulin secretion may still exist in penguins despite its loss of *Tas1r2*. In addition, mouse *Trpm5* functions in the signal transduction of volatile pheromones detected by the main olfactory epithelium [S36]. These considerations together suggest that the unresolvable antagonistic pleiotropy of *Trpm5* imposed by the extremely cold Antarctic may be responsible for the major taste loss in penguins. Note that the pseudogenization of *Trpm5* in some whales [S6] is not necessarily contradictory to the notion that *Trpm5* has non-taste functions, because the non-taste functions of *Trpm5* may be useless to whales. For instance, the fully aquatic whales have degenerated olfaction [S37], whereas olfaction is critical to penguins for prey and kin recognition [S38, 39]. Thus, transducing volatile pheromone signals by *Trpm5* may be unnecessary for whales but important for penguins. The *Trpm5* hypothesis predicts that all Antarctic and Arctic vertebrates that have inhabited these cold areas for long enough time should lack the sweet, umami, and bitter tastes, which could be tested in the future.

It is noteworthy that although penguins are not limited to the Antarctic, they originated from the Antarctic [S17]. Recent molecular dating [S40] suggested that the extant penguins radiated ~20 million years ago, after the formation of large ice sheets in the Antarctic 34 to 25 million years ago. If ancestral penguins had lost the receptor genes for the three tastes while in

the Antarctic, the genes and the tastes cannot be regained even when some penguins migrated out of the Antarctic. Considering such historical contingencies is important when making sense of the relationship between the feeding ecology and taste ability among species.

It is noteworthy that *Tas1rs* and *Tas2rs* have been proposed to possess non-taste functions [S35, 41]. The fact that they are dispensable in penguins suggests that these functions, discovered mostly in humans and/or mice, are physiologically unimportant in penguins.

## SUPPLEMENTAL EXPERIMENTAL PROCEDURES

### Analysis of avian genome sequences

To identify a gene with multiple exons, we used mouse and/or chicken genes as queries to conduct BLAST searches [S42] against the whole genome sequences of 16 birds (Fig. 1). Genome data for the two penguins and the little egret were published elsewhere [S19], the swift genome data were retrieved from GigaDB (<http://gigadb.org/>), and the draft genomes of the remaining 12 birds were obtained from GenBank with the following assembly IDs: zebra finch (GCA\_000 151 805.2), ground finch (GCA\_000 277 835.1), ground tit (GCA\_000 331 425.1), flycatcher (GCA\_000 247 815.2), Amazon parrot (GCA\_000 332 375.1), macaw (GCA\_000 400 695.1), falcon (GCA\_000 337 955.1), hummingbird (GCA\_000 699 085.1), dove (GCA\_000 337 935.1), chicken (GCA\_000 002 315.2), turkey (GCA\_000 146 605.2), and mallard (GCA\_000 355 885.1). To determine the exon/intron structures, we used BLAST2 and GeneWise [S43] programs to predict the coding regions in the targeted genomic fragments following manual compilation. We used this approach to identify all genes of interest except the single-exon genes *Tas2rs*, which were identified following a previous study [S13]. To ensure the accuracy of gene prediction, all identified genes were used to conduct BLASTP searches against the GenBank and confirmed by their best hits, which must be the known genes of interest [S13].

### Polymerase chain reaction (PCR) and DNA sequencing

To amplify *Tas1r1*, *Tas1r3*, *Tas2r1*, *Tas2r2*, and *Calhm1* from three additional penguins, seven tubenose seabirds, and one red-throated loon (Fig. 1), we designed a suite of primers based on the intact forms of relevant genes from the little egret, which is the most closely related species to penguins with available genome data. Two to four pairs of primers were designed to amplify each segment of the targeted genes. The primer sequences for each gene segment are: *Tas1r1* exon 3 (T1E3F1: AGATTAGCTACGAAGCCTC, T1E3R1: GGATAGACTGTGCCTTTGC; T1E3F2: ACCCCTCGTTCCTGCGCACC, T1E3R2: CGAGGCACAGCCCAGCAGGT), *Tas1r1* exon 6 (T1E6F1: AGCGAAGCTTGCTTCAACCG, T1E6R1: AGTGCTGCGAGCGTGCCCA; T1E6F2: CTGTCCTCCTCCTGCTGCTCA; T1E6R2: CTCAGGTGGAGCAGCAGGC; T1E6F3: GGAGCGAAGCTTGCTTCAACCG, T1E6R3: GCGCGTGTACTCCTGGAT), *Tas1r3* exon 3 (T3E3F1: AGGTCAGCTATGGAGCCAG, T3E3R1: ACCCCAGCGCTCTGTGCAG; T3E3F2: GAGTTTGGATGGAAGTGGAT, T3E3R2: GCGCGTAAGCCACGCTGTA), *Tas1r3* exon 6 (T3E6F1: AGACAGCTCCACCTGCACTCC, T3E6R1: AAATAATCCACTGTGTTCA; T3E6F2: ACAGCACCAGCTGCTCCCC, T3E6R2: GTTTATTGCCTGCTCCTGCTCTGG; T3E6F3: TCCCTGCCTAGAGCATCAGT, T3E6R3: AGAGTCCTCCTCTGGCTCCT; T3E6F4: TCCCTGCCTAGAGCATCAGT, T3E6R4: TTTATTGAGAGTCCTCCTCTGG); *Tas2r1* (PET2R1F1: ATGGATGCTTGTTACTCTCA, PET2R1R1: CTACCTCACGCAAACCTTTACAC; PET2R1F2: ATTTAATGCCACTTCATAC, PET2R1R2: ACGCAAACCTTTACTTTC; PET2R1F3:



GGATGCTTGTTACTCTCAAGATAAAT, PET2R1R3: ACACTTCACACAGGGCAGAG); *Tas2r2* (PET2R2F3: AATAAGCTTTGTAGCTATTGAAGT, PET2R2R3: TGAGGCATAAAGTCATATTTTCCA; PET2R2F4: TTGTTGGTTTTATTGGAAATGG, PET2R2R3: TGAGGCATAAAGTCATATTTTCCA). Avian tissues were acquired from the Museum of Zoology, University of Michigan. The genomic DNAs were purified using the Qiagen DNeasy kit. PCRs were conducted in a 30 $\mu$ l reaction mixture, which contained 0.5 $\mu$ l genomic DNA (10 ng/ $\mu$ l), 15 $\mu$ l of 2 $\times$ PCR solution (Takara Premix Taq<sup>TM</sup>), and 1 $\mu$ l of each primer (10  $\mu$ M). All PCRs were carried out on a BioRad T100 Thermal Cycler, with the following cycling parameters: an initial denaturation at 94°C for 5 min, 30 cycles of denaturation at 94°C for 30 s, annealing at a temperature gradient from 50°C to 55°C for 30 s, extension at 72°C for 60 s, and a final elongation at 72°C for 5 min. All PCR products were purified and sequenced directly in both forward and reverse directions by Sanger sequencing. Newly generated sequences were submitted to GenBank under accessions KP121467-KP121504.

### Evolutionary analysis

The DNA sequences were aligned based on protein sequence alignment by MUSCLE [S44] with manual adjustments. We applied the modified Nei-Gojobori method [S45] to calculate  $d_S$  and  $d_N$  and their variances between pairs of DNA sequences. We also analyzed the variation in  $\omega$  (nonsynonymous to synonymous rate ratio) along a bird phylogeny (Fig. 1) as well as the action of purifying selection using PAML [S46]. A likelihood ratio test was employed to compare nested models. We inferred ancestral gene sequences using PAML [S46].

### SUPPLEMENTAL REFERENCES

- S1. Yarmolinsky, D.A., Zuker, C.S., and Ryba, N.J.P. (2009). Common sense about taste: from mammals to insects. *Cell* 139, 234-244.
- S2. Jiang, P., Josue, J., Li, X., Glaserb, D., Li, W., Branda, J.G., Margolskeea, R.F., Reeda, D.R., and Beauchamp, G.K. (2012). Major taste loss in carnivorous mammals. *Proc Natl Acad Sci U S A* 109, 4956-4961.
- S3. Zhao, H., Yang, J.-R., Xu, H., and Zhang, J. (2010). Pseudogenization of the umami taste receptor gene *Tas1r1* in the giant panda coincided with its dietary switch to bamboo. *Mol Biol Evol* 27, 2669-2673.
- S4. Zhao, H., Xu, D., Zhang, S., and Zhang, J. (2012). Genomic and genetic evidence for the loss of umami taste in bats. *Genome Biol Evol* 4, 73-79.
- S5. Zhao, H., Zhou, Y., Pinto, C.M., Charles-Dominique, P., Galindo-González, J., Zhang, S., and Zhang, J. (2010). Evolution of the sweet taste receptor gene *Tas1r2* in bats. *Mol Biol Evol* 27, 2642-2650.
- S6. Feng, P., Zheng, J.S., Rossiter, S.J., Wang, D., and Zhao, H. (2014). Massive losses of taste receptor genes in toothed and baleen whales. *Genome Biol Evol* 6, 1254-1265.
- S7. Hong, W., and Zhao, H. (2014). Vampire bats exhibit evolutionary reduction of bitter taste receptor genes common to other bats. *Proc Biol Sci* 281, 20141079.
- S8. Roura, E., Baldwin, M.W., and Klasing, K.C. (2013). The avian taste system: Potential implications in poultry nutrition. *Anim Feed Sci Tech* 180, 1-9.
- S9. Klasing, K.C. (1998). Anatomy and physiology of the digestive system. In *Comparative avian nutrition*, K.C. Klasing, ed. (Oxford, UK: CAB International).
- S10. Berkhoudt, H. (1985). Special sense organs: structure and function of the avian taste

- receptors. In *Form and function in birds*, A.S. King and J. McLeland, eds. (Academic Press: New York), pp. 463-496.
- S11. Gill, F.B. (2006). *Ornithology*, (New York: WH Freeman).
- S12. Baldwin, M.W., Toda, Y., Nakagita, T., O'Connell, M.J., Klasing, K.C., Misaka, T., Edwards, S.V., and Liberles, S.D. (2014). Evolution of sweet taste perception in hummingbirds by transformation of the ancestral umami receptor. *Science* *345*, 929-933.
- S13. Shi, P., and Zhang, J. (2006). Contrasting modes of evolution between vertebrate sweet/umami receptor genes and bitter receptor genes. *Mol Biol Evol* *23*, 292-300.
- S14. Li, D., and Zhang, J. (2014). Diet shapes the evolution of the vertebrate bitter taste receptor gene repertoire. *Mol Biol Evol* *31*, 303-309.
- S15. Behrens, M., Korsching, S., and Meyerhof, W. (2014). Tuning properties of avian and frog bitter taste receptors dynamically fit gene repertoire sizes. *Mol Biol Evol* *31*, 3216-3227.
- S16. Davis, J.K., Lowman, J.J., Thomas, P.J., ten Hallers, B.F., Koriabine, M., Huynh, L.Y., Maney, D.L., de Jong, P.J., Martin, C.L., and Thomas, J.W. (2010). Evolution of a bitter taste receptor gene cluster in a New World sparrow. *Genome Biol Evol* *2*, 358-370.
- S17. Baker, A.J., Pereira, S.L., Haddrath, O.P., and Edge, K.A. (2006). Multiple gene evidence for expansion of extant penguins out of Antarctica due to global cooling. *Proc Biol Sci* *273*, 11-17.
- S18. Woehler, E.J., and Croxall, J.P. (1997). The status and trends of Antarctic and sub-Antarctic seabirds. *Mar Ornithol* *25*, 43-66.
- S19. Li, C., Zhang, Y., Li, J., Kong, L., Hu, H., Pan, H., Xu, L., Deng, Y., Li, Q., Jin, L., et al. (2014). The genomes of two Antarctic penguins reveal adaptations to the cold aquatic environment. *GigaScience*, in press.
- S20. Hackett, S.J., Kimball, R.T., Reddy, S., Bowie, R.C.K., Braun, E.L., Braun, M.J., Chojnowski, J.L., Cox, W.A., Han, K.L., Harshman, J., et al. (2008). A phylogenomic study of birds reveals their evolutionary history. *Science* *320*, 1763-1768.
- S21. Horio, N., Yoshida, R., Yasumatsu, K., Yanagawa, Y., Ishimaru, Y., Matsunami, H., and Ninomiya, Y. (2011). Sour taste responses in mice lacking PKD channels. *PLoS One* *6*, e20007.
- S22. Taruno, A., Vingtdeux, V., Ohmoto, M., Ma, Z., Dvoryanchikov, G., Li, A., Adrien, L., Zhao, H., Leung, S., Abernethy, M., et al. (2013). CALHM1 ion channel mediates purinergic neurotransmission of sweet, bitter and umami tastes. *Nature* *495*, 223-226.
- S23. Zhang, Y., Hoon, M.a., Chandrashekar, J., Mueller, K.L., Cook, B., Wu, D., Zuker, C.S., and Ryba, N.J.P. (2003). Coding of sweet, bitter, and umami tastes: different receptor cells sharing similar signaling pathways. *Cell* *112*, 293-301.
- S24. Damak, S., Rong, M., Yasumatsu, K., Kokrashvili, Z., Pérez, C.a., Shigemura, N., Yoshida, R., Mosinger, B., Glendinning, J.I., Ninomiya, Y., et al. (2006). Trpm5 null mice respond to bitter, sweet, and umami compounds. *Chem Senses* *31*, 253-264.
- S25. Bach, T.L., Chen, Q.M., Kerr, W.T., Wang, Y., Lian, L., Choi, J.K., Wu, D., Kazanietz, M.G., Koretzky, G.A., Zigmond, S., et al. (2007). Phospholipase cbeta is critical for T cell chemotaxis. *J Immunol* *179*, 2223-2227.
- S26. Li, Z., Jiang, H., Xie, W., Zhang, Z., Smrcka, A.V., and Wu, D. (2000). Roles of PLC-beta2 and -beta3 and PI3Kgamma in chemoattractant-mediated signal transduction. *Science* *287*, 1046-1049.
- S27. Kobayashi, K., Kumakura, M., Yoshimura, K., Inatomi, M., and Asami, T. (1998). Fine

- structure of the tongue and lingual papillae of the penguin. *Arch Histol Cytol. Mar* *61*, 37-46.
- S28. Talavera, K., Yasumatsu, K., Voets, T., Droogmans, G., Shigemura, N., Ninomiya, Y., Margolskee, R.F., and Nilius, B. (2005). Heat activation of TRPM5 underlies thermal sensitivity of sweet taste. *Nature* *438*, 1022-1025.
- S29. Haraguchi, T., Yoshida, M., Hazekawa, M., and Uchida, T. (2011). Synergistic effects of sour taste and low temperature in suppressing the bitterness of aminoleban(R) en. *Chem Pharm Bull (Tokyo)* *59*, 536-540.
- S30. Dhaka, A., Viswanath, V., and Patapoutian, A. (2006). Trp ion channels and temperature sensation. *Annu Rev Neurosci* *29*, 135-161.
- S31. Ellington, A.D., and Szostak, J.W. (1990). In vitro selection of RNA molecules that bind specific ligands. *Nature* *346*, 818-822.
- S32. Qian, W., Ma, D., Xiao, C., Wang, Z., and Zhang, J. (2012). The genomic landscape and evolutionary resolution of antagonistic pleiotropy in yeast. *Cell Rep* *2*, 1399-1410.
- S33. Colsoul, B., Schraenen, A., Lemaire, K., Quintens, R., Van Lommel, L., Segal, A., Owsianik, G., Talavera, K., Voets, T., Margolskee, R.F., et al. (2010). Loss of high-frequency glucose-induced Ca<sup>2+</sup> oscillations in pancreatic islets correlates with impaired glucose tolerance in *Trpm5*<sup>-/-</sup> mice. *Proc Natl Acad Sci U S A* *107*, 5208-5213.
- S34. Brixel, L.R., Monteilh-Zoller, M.K., Ingenbrandt, C.S., Fleig, A., Penner, R., Enklaar, T., Zabel, B.U., and Prawitt, D. (2010). TRPM5 regulates glucose-stimulated insulin secretion. *Pflugers Arch* *460*, 69-76.
- S35. Kyriazis, G.A., Soundarapandian, M.M., and Tyrberg, B. (2012). Sweet taste receptor signaling in beta cells mediates fructose-induced potentiation of glucose-stimulated insulin secretion. *Proc Natl Acad Sci U S A* *109*, E524-532.
- S36. Lopez, F., Delgado, R., Lopez, R., Bacigalupo, J., and Restrepo, D. (2014). Transduction for pheromones in the main olfactory epithelium is mediated by the Ca<sup>2+</sup> -activated channel TRPM5. *J Neurosci* *34*, 3268-3278.
- S37. Kishida, T., Kubota, S., Shirayama, Y., and Fukami, H. (2007). The olfactory receptor gene repertoires in secondary-adapted marine vertebrates: evidence for reduction of the functional proportions in cetaceans. *Biol Lett.* *3*, 428-430.
- S38. Coffin, H.R., Watters, J.V., and Mateo, J.M. (2011). Odor-based recognition of familiar and related conspecifics: a first test conducted on captive Humboldt penguins (*Spheniscus humboldti*). *PLoS ONE* *6*, e25002.
- S39. Cunningham, G.B., Strauss, V., and Ryan, P.G. (2008). African penguins (*Spheniscus demersus*) can detect dimethyl sulphide, a prey-related odour. *J Exp Biol* *211*, 3123-3127.
- S40. Subramanian, S., Beans-Picon, G., Swaminathan, S.K., Millar, C.D., and Lambert, D.M. (2013). Evidence for a recent origin of penguins. *Biol Lett.* *9*, 20130748.
- S41. Tizzano, M., Gulbransen, B.D., Vandenbeuch, A., Clapp, T.R., Herman, J.P., Sibhatu, H.M., Churchill, M.E., Silver, W.L., Kinnamon, S.C., and Finger, T.E. (2010). Nasal chemosensory cells use bitter taste signaling to detect irritants and bacterial signals. *Proc Natl Acad Sci U S A* *107*, 3210-3215.
- S42. Camacho, C., Coulouris, G., Avagyan, V., Ma, N., Papadopoulos, J., Bealer, K., and Madden, T.L. (2009). BLAST+: architecture and applications. *BMC Bioinformatics* *10*, 421.
- S43. Birney, E., Clamp, M., and Durbin, R. (2004). GeneWise and Genomewise. *Genome Res* *14*, 988-995.

- S44. Edgar, R.C. (2004). MUSCLE: a multiple sequence alignment method with reduced time and space complexity. *BMC Bioinformatics* 5, 113.
- S45. Zhang, J., Rosenberg, H.F., and Nei, M. (1998). Positive Darwinian selection after gene duplication in primate ribonuclease genes. *Proc Natl Acad Sci U S A* 95, 3708-3713.
- S46. Xu, B., and Yang, Z. (2013). PAMLX: a graphical user interface for PAML. *Mol Biol Evol* 30, 2723-2724.

(a) *Tas1r1* exon 3

590
Chicken TCTGTTGAGCAGGACAGCCACCATGCTGAAAGCCCTTGAATCGTGGGAAAATGCAAGGAAAGCTGCCGTGCTGGAAGTGTGGCAGCAGAGGGTGGGGGTGGCAA
Streaked shearwater TCAAGTTGAGAAGACGAGTCCACGATGCTGGAACGCTTTGAATCTTGGAGGATGGCAGAGAAAGCCCTGCCGTGAAATGTGTGGCAGCAGAGGGCAGGTGGAGGAAT
Emperor penguin TCGGTTGAGAAGACAGTCCACGATGCTGGAACGCTTTGAATCTTGGAGGATGGCAGAGAAAGCACTGTGGCTGAATGTGCCGGCAGCAGAGGGCAGGGCGGGGAAT
King penguin TCGGTTGAGAAGACAGTCCACGATGCTGGAACGCTTTGAATCTTGGAGGATGGCAGAGAAAGCACTGTGGCTGAATGTGCCGGCAGCAGAGGGCAGGGCGGGGAAT
Chinstrap penguin TCAGTTGAGAAGACAGTCCACGATGCTGGAACGCTTTGAATCTTGGAGGATGGCAGAGAAAGCACTGTGGCTGAATGTGCCGGCAGCAGAGGGCAGGGCGGGGAAT
Adelie penguin TCGGTTGAGAAGACAGTCCACGATGCTGGAACGCTTTGAATCTTGGAGGATGGCAGAGAAAGCACTGTGGCTGAACGTGCCGGCAGCAGAGGGCAGGGCGGGGAAT

(b) *Tas2r3*

620
Little egret ATGTGATATATGGTCTTTCTGAGTTTATCCAGATCTTTTGGCAGCTCTGATGCTGATGATTTCCCAAGTGTGTTGTTAAACCTCCATTAAGAAGAAAATTTG
Emperor penguin ATATGATATATGATCTTTCTGAGTTTATCCAGATCTTTTGGCAGCTCTGATGCTGATGATTTCCCAAGTGTGTTGTTAAACCTCCATTAAGAAGAAAATTTG
Adelie penguin ATACGATATGATCTTTCTGAGTTTATCCAGATCTTTTGGCAGCTCTGATGCTGATGATTTCCCAAGTGTGTTGTTAAACCTCCATTAAGAAGAAAATTTG

(c) *Tas2r1*

350
Zebra finch GACTTGTCTCAAATATTTCCCTATTCGCTTCTGCTTTCATCCCATCTTCACTCTTCAAGTCTTACAGCTTTTAAATAGTCCAACCTGTGGGTTTCTGCCTT
Little egret TCCTTTCTTCAATAATTTATCCCTGGCGCTTTATGTTCCAGCCATACCCCACTAATTTGACAGCTTTTCAAAGCTTTTAAACTCTTCTGACTGTGGGTTTCTGCCTG
Red-throat loon TCCTTTCTTCAATAATTTATCCCTGGCGCTTTATGTTCCAGCCATACCCCACTAATTTGACAGCTTTTCAAAGCTTTTAAACTCTTCCAACCTGTGAGTTTCTGCCTG
Streaked shearwater TTCTTTCTTCAATAATTTATCCCTGGCGCTTTATGTTCCAGCCATACCCCACTAATTTGACAGCTTTTCAAAGCTTTTAAACTCTTCAAACCTGTGAGTTTCTGCCTG
Northern fulmar TTATTTCTTCAATAATTTATCCCTGGCGCTTTATGTTCCAGCCATACCCCACTAATTTGACAGCTTTTCAAAGCTTTTAAACTCTTCAAACCTGTGAGTTTCTGCCTG
King penguin TCCTTTCTTCAATAATTTATCCCTGGCGCTTTATGTTCCAGCCATACCCCACTAATTTGACAGCTTTTCAAAGCTTTTAAACTCTTCAAACCTGTGAGTTTCTGCCTG
Emperor penguin TCCTTTCTTCAATAATTTATCCCTGGCGCTTTATGTTCCAGCCATACCCCACTAATTTGACAGCTTTTCAAAGCTTTTAAACTCTTCAAACCTGTGAGTTTCTGCCTG
Adelie penguin TCCTTTCTTCAATAATTTATCCCTGGCGCTTTATGTTCCAGCCATACCCCACTAATTTGACAGCTTTTCAAAGCTTTTAAACTCTTCAAACCTGTGAGTTTCTGCCTG
Rockhopper penguin TCCTTTCTTCAATAATTTATCCCTGGCGCTTTATGTTCCAGCCATACCCCACTAATTTGACAGCTTTTCAAAGCTTTTAAACTCTTCAAACCTGTGAGTTTCTGCCTG
Chinstrap penguin TCCTTTCTTCAATAATTTATCCCTGGCGCTTTATGTTCA-----CCCAACTATCTGCAGTAAATCAAACCTTTTAAACTCTTCAAACCTGTGAGTTTCTGCCTG

(d) *Tas2r2*

350
Little egret TACAAAGCTTTTGGTGTGTATGGATTTTGTAAACCATGCCAGTTTGGTTCAGTACCTGGCTCTACGTACTCTACTGTGTAAAAATAATCAATGTCACCCAATGGCT
Streaked shearwater TACAAAGCTTTTGGTGTGTATGGATTTTGTAAACCATGCCAGTTTGGTTCAGTACCTGGCTCTATGTACTCTACTGTGTAAAAATAATCAATGTCACCCAATGGCT
Red-throat loon TATAAAGCTTTTGGCGCTATATGGATTTTGTAAACCATGCCAGTTTATGGTTCAGTACCTGGCTCTATGTACTCTACTGTGTAAAAATAATCAATGTCACCCAATGGCT
Emperor penguin TACAAAGCTTTTGGTGTGTATGGATTTTGTAAACCATGCCAGTTTGGTTCAGTACCTGGCTCTAGTACTCTACTGTGTAAAAATAATCAATGTCACCCAATGGCT
King penguin TACAAAGCTTTTGGTGTGTATGGATTTTGTAAACCATGCCAGTTTGGTTCAGTACCTGGCTCTAGTACTCTACTGTGTAAAAATAATCAATGTCACCCAATGGCT
Adelie penguin ?????????????????????????????????????????????????????????????????????????????????????????????????????????????????
Rockhopper penguin TACAAAGCTTTTGGTGTGTATGGATTTTGTAAACCATGCCAGTTTGGTTCAGTACCTGGCTCTAGTACTCTACTGTGTAAAAATAATCAATGTCACCCAATGGCT

(e) *Calhm1*

360
Chicken TGGAGGCGGCCAGGCCAGCGGAGGAAGATGAGCCGCTCCGCTACATGTTCTGCTCCATGGTGCAGGGCCATGATCGCCCGGCGCTGGGTGTCAGTGACA--CTGCTGG
Little egret TGGAGGCGGCCAGGCCAGCGGAGGAAGACCGGGCTGCTCCGCTACATGTTCTGCTCCATGGCAGCGGGCCATGATCGCCCGGCGCTGGGTGTCAGTGAGC--CTGCTGG
Streaked shearwater TGGAGGCGGCCAGGCCAGCGGAGGAAGACCGGGCTGCTCCGCTACATGTTCTGCTCCATGGCAGCGGGCCATGATCGCCCGGCGCTGGGTGTCAGTGAGC--CTGCTGG
Emperor penguin CGGAGGCGGCCAGGCCAGCGGAGGAAGACCGGGCTGCTCCGCTACATGTTCTGCTCCATGGCAGCGGGCCATGATCGCCCGGCGCTGGGTGTCAGTGAGCATTGCTGG
King penguin CGGAGGCGGCCAGGCCAGCGGAGGAAGACCGGGCTGCTCCGCTACATGTTCTGCTCCATGGCAGCGGGCCATGATCGCCCGGCGCTGGGTGTCAGTGAGCATTGCTGG
Chinstrap penguin TGGAGGCGGCCAGGCCAGCGGAGGAAGACCGGGCTGCTCCGCTACATGTTCTGCTCCATGGCAGCGGGCCATGATCGCCCGGCGCTGGGTGTCAGTGAGC--CTGCTGG
Adelie penguin TGGAGGCGGCCAGGCCAGCGGAGGAAGACCGGGCTGCTCCGCTACATGTTCTGCTCCATGGCAGCGGGCCATGATCGCCCGGCGCTGGGTGTCAGTGAGC--CTGCTGG
Rockhopper penguin CGGAGGCGGCCAGGCCAGCGGAGGAAGACCGGGCTGCTCCGCTACATGTTCTGCTCCATGGCAGCGGGCCATGATCGCCCGGCGCTGGGTGTCAGTGAGC--CTGCTGG
480
Chicken ATGGGAATGCATCAGTGTGCTTTCTGACCTCACTGCCGTGGAGCCCTGGGCAATGCCAGCCACCATGGCTCCCCAGGGAGAGTGAAGCGGGTCTCGCCGCATCCCTGCA
Little egret ATGGGAATGCATCAGTGTGCTTTCTGACCTCGGTGCCATGGAGACCTGGGCAACAGCCAGCCACCTGGCTCTCCCAAGGAGAGATGAAGCGGGTCTCGCCGCATCCCTGCA
Streaked shearwater ATGGGAATGCATCAGTGTGCTTTCTGACCTCGGTGCCATGGAGACCTGGGCAACAGCCAGCCACCTGGCTCTCCCAAGGAGAGATGAAGCGGGTCTCGCCGCATCCCTGCA
Emperor penguin ATGGGAATGCATCAGTGTGCTTTCTGACCTCGGTGCCATGGAGACCTGGGCAACAGCCAGCCACCTGGCTCTCCCAAGGAGAGATGAAGCGGGTCTCGCCGCATCCCTGCA
King penguin ATGGGAATGCATCAGTGTGCTTTCTGACCTCGGTGCCATGGAGACCTGGGCAACAGCCAGCCACCTGGCTCTCCCAAGGAGAGATGAAGCGGGTCTCGCCGCATCCCTGCA
Chinstrap penguin ATGGGAATGCATCAGTGTGCTTTCTGACCTCGGTGCCATGGAGACCTGGGCAACAGCCAGCCACCTGGCTCTCCCAAGGAGAGATGAAGCGGGTCTCGCCGCATCCCTGCA
Adelie penguin ATGGGAATGCATCAGTGTGCTTTCTGACCTCGGTGCCATGGAGACCTGGGCAACAGCCAGCCACCTGGCTCTCCCAAGGAGAGATGAAGCGGGTCTCGCCGCATCCCTGCA
Rockhopper penguin ATGGGAATGCATCAGTGTGCTTTCTGACCTCGGTGCCATGGAGACCTGGGCAACAGCCAGCCACCTGGCTCTCCCAAGGAGAGATGAAGCGGGTCTCGCCGCATCCCTGCA

(f) Taxa and genes examined

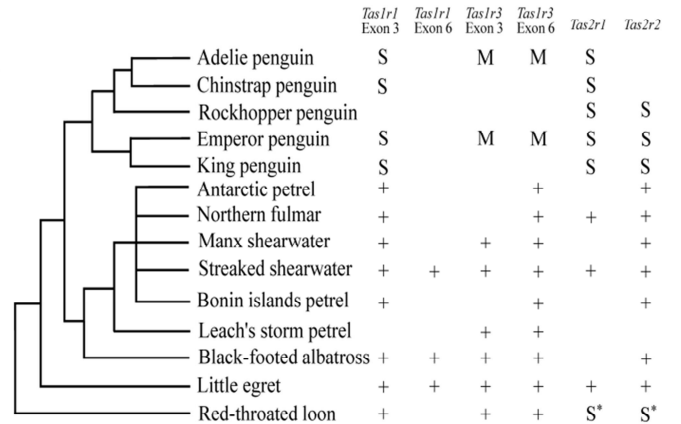

(g) Numbers of *Tas2rs* in avian genomes

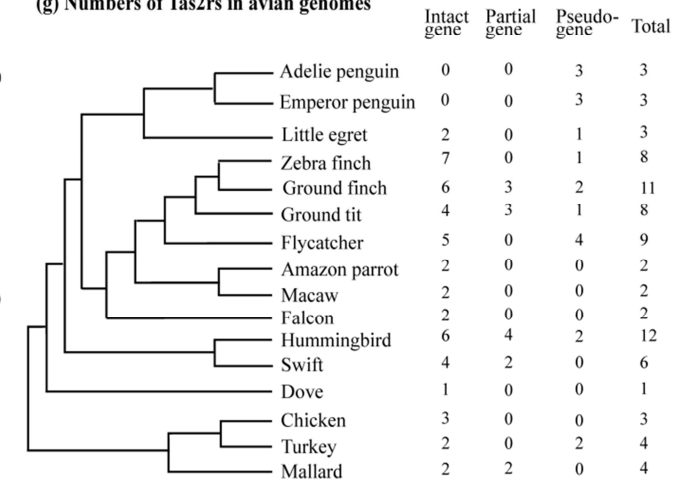

**Fig. S1.** Taste receptor and transduction genes in penguins and selected outgroups. **(a)** Alignment of *Tas1r1* exon 3. **(b)** Alignment of *Tas2r3*. **(c)** Alignment of *Tas2r1*. **(d)** Alignment of *Tas2r2*. **(e)** Alignment of *Calhm1*. In all alignments, frame-shifting mutations and nonsense mutations are boxed, whereas premature stop codons resulting from frame-shifting mutations are underlined. The correct reading frames in functional receptors are indicated by shading. Dashes denote alignment gaps, whereas question marks indicate unknown nucleotides due to incomplete genome sequencing. Numbers after the alignments indicate alignment positions following the first sequences. **(f)** Taxa and genes examined. “+” indicates intact sequence, “M” represents missing data from the genome sequence, “S” stands for pseudogenization by shared premature stop codons, “S<sup>\*</sup>” indicates unshared premature stop codons, and genes or exons without any sign were not sequenced. The lengths of *Tas1r1* exon 3, *Tas1r1* exon 6, *Tas1r3* exon 3, *Tas1r3* exon 6, *Tas2r1*, and *Tas2r2* that we sequenced in birds are approximately 770, 600, 730, 850, 940, and 630 nucleotides, respectively. The bird phylogeny follows [S20]. **(e)** Numbers of Tas2r bitter taste receptor genes and pseudogenes in avian genomes examined in this study. An intact gene has the complete coding region and an intact open reading frame; a partial gene has an intact open reading frame but with partial coding region resulting from incomplete genome sequencing; and a pseudogene has a disrupted open reading frame due to a premature stop codon or frame-shifting mutation. The bird phylogeny follows [S20]. See also Fig. 1.

**Table S1.** Likelihood ratio tests of selection in the evolution of avian taste transduction genes *Trpm5* and *Calhm1*. Significant *P* values (<0.05) are italicized. See also Fig. 1.

| Datasets and models                                                                                                                        | $\omega$ ( $d_N/d_S$ )                           | Comparisons | <i>P</i> values            |
|--------------------------------------------------------------------------------------------------------------------------------------------|--------------------------------------------------|-------------|----------------------------|
| <b>Data set I: 15 <i>Trpm5</i> sequences</b> (14 non-penguins plus the ancestral sequence of two penguins)                                 |                                                  |             |                            |
| A. All branches have the same $\omega_0$                                                                                                   | $\omega_0=0.197$                                 |             |                            |
| B. Ancestral branch of two penguins has $\omega_2$ and other branches have $\omega_1$                                                      | $\omega_1=0.192, \omega_2=0.496$                 | B vs. A     | <i>0.0037</i>              |
| C. Ancestral branch of two penguins has a fixed $\omega_2=1$ ; other branches have $\omega_1$                                              | $\omega_1=0.193, \omega_2=1$                     | B vs. C     | <i>0.0368</i>              |
| <b>Data set II: 16 <i>Trpm5</i> sequences</b> (14 non-penguins plus two penguins)                                                          |                                                  |             |                            |
| D. Ancestral branch of two penguins and branches connecting two penguins have $\omega_2$ , whereas other branches have $\omega_1$          | $\omega_1=0.194, \omega_2=0.321$                 |             |                            |
| E. Ancestral branch of two penguins has $\omega_3$ , branches connecting two penguins have $\omega_2$ , and other branches have $\omega_1$ | $\omega_1=0.194, \omega_2=0.197, \omega_3=0.489$ | E vs. D     | 0.0563                     |
| F. Ancestral branch of two penguins and branches connecting two penguins have a fixed $\omega_2=1$ ; other branches have $\omega_1$ ,      | $\omega_1=0.195, \omega_2=1$                     | F vs. D     | <i>1.6×10<sup>-6</sup></i> |
| <b>Data set III: 18 <i>Calhm1</i> sequences</b> (17 non-penguins plus the ancestral sequence of five penguins)                             |                                                  |             |                            |
| G. All branches have the same $\omega_0$                                                                                                   | $\omega_0=0.098$                                 |             |                            |
| H. Ancestral branch of five penguins has $\omega_2$ , and other branches have $\omega_1$                                                   | $\omega_1=0.097, \omega_2=0.115$                 | H vs. G     | 0.8007                     |
| <b>Data set IV: 22 <i>Calhm1</i> sequences</b> (17 non-penguins plus five penguins)                                                        |                                                  |             |                            |
| I. All branches have the same $\omega_0$                                                                                                   | $\omega_0=0.111$                                 |             |                            |
| J. Branches connecting five penguins have $\omega_2$ , and other branches have $\omega_1$                                                  | $\omega_1=0.098, \omega_2=0.322$                 | J vs. I     | <i>3.4×10<sup>-6</sup></i> |
